# Supplementary material
Source: PubMed Central journal article supplement (PMC11386471)
Supplement: PBI-18-805-s001.pdf [file PBI-18-805-s001.pdf]

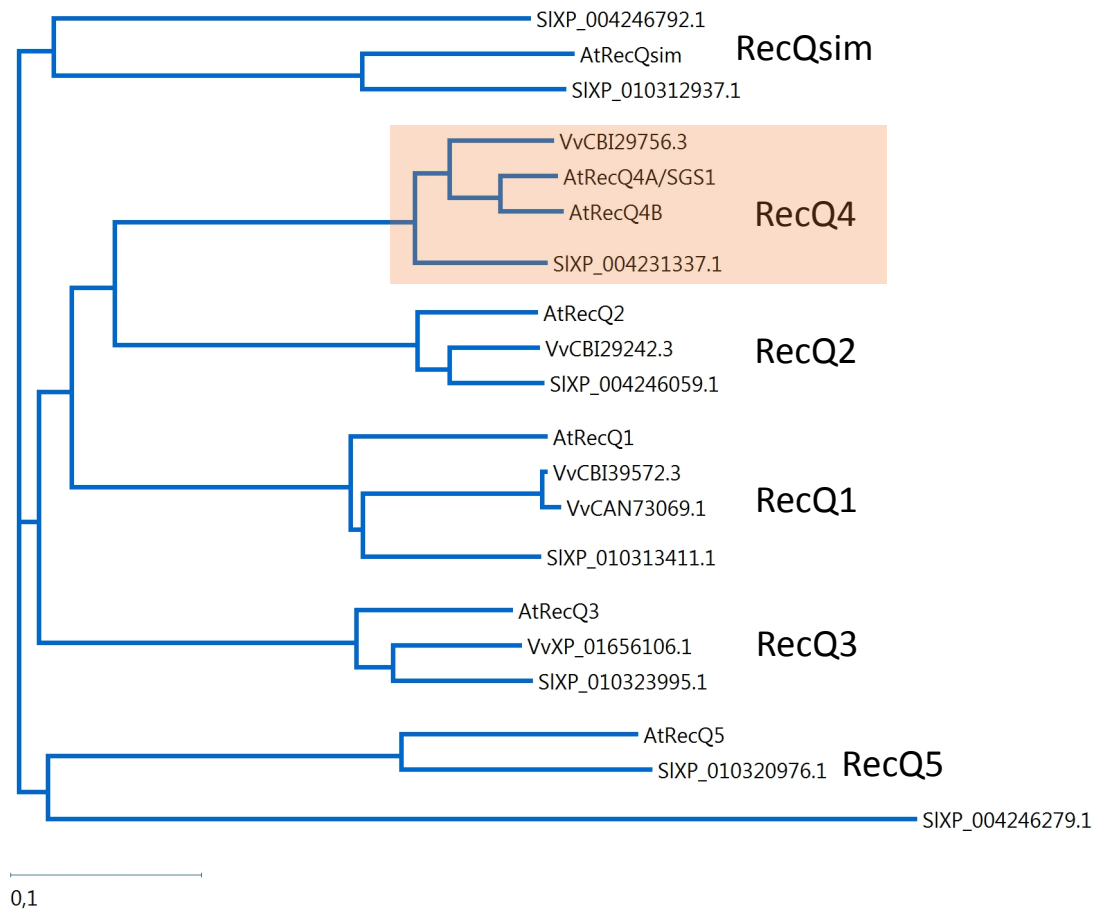

**Figure S1** Neighbour-Joining tree of RECQ family protein sequences from Arabidopsis, grape (*Vitis vinifera*) and tomato. Protein sequences are named by their common name (Arabidopsis) or their Genbank accession number. XP\_ numbers indicate proteins predicted from transcript models.

(a)

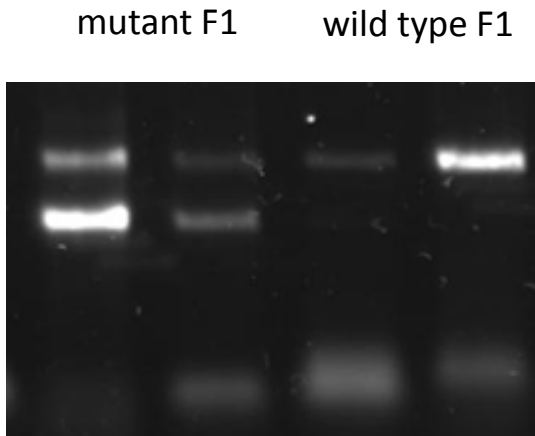

(b)

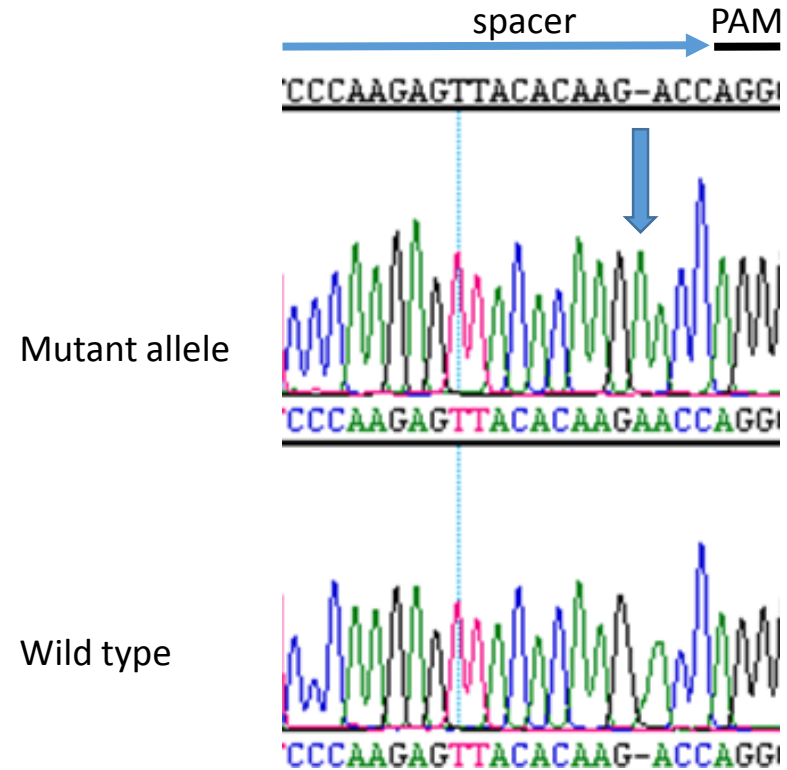

**Figure S2** (a) RECQ4 cDNA from the *recq4* F1 hybrid (left lanes) and wild type hybrid (right lanes) showing the single band for the wild type alleles' cDNA (top right), the 1nt-insertion allele of *Solanum pimpinellifolium* (top left), and the additional band for the 254 bp deletion of the cv. Moneymaker allele. (b) Sanger sequencing traces of the *S. pimpinellifolium* wild type and 1 nt-insertion alleles

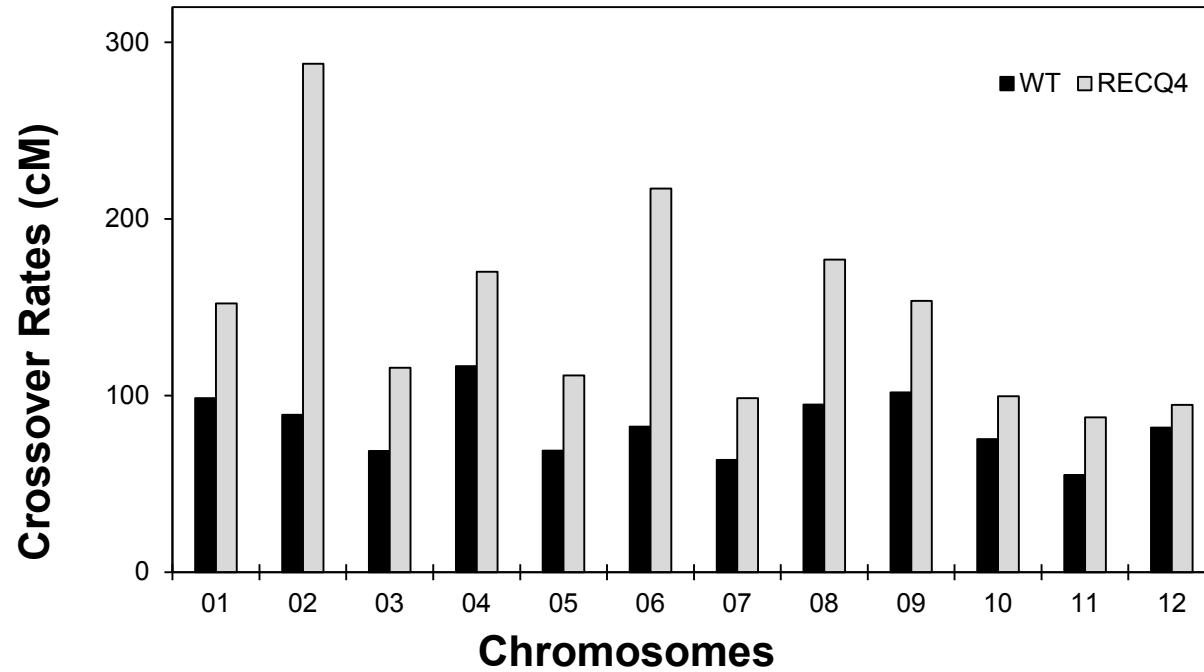

**Figure S3.** Cumulative genetic map length in cM for the twelve chromosomes of wild type F1 (left, black) and *recq4* F1 (right, grey) of the *Solanum lycopersicum* x *S. pimpinellifolium* cross.

**Table S1.** List of KASP markers used for obtaining the genetic maps and their physical position in the tomato genome version SL2.4C  
 "c" indicates the markers flanking the centromer

| Marker        | Chromosome Position (Mb) |      | Marker        | Chromosome Position (Mb) |      |   |
|---------------|--------------------------|------|---------------|--------------------------|------|---|
| seq-rs465     | 1                        | 0.2  | seq-rs400     | 8                        | 0.4  |   |
| sl_60356_ch0  | 1                        | 1.4  | seq-rs8017    | 8                        | 1.0  |   |
| sl_60089_ch0  | 1                        | 2.8  | seq-rs8030    | 8                        | 2.9  | c |
| sl_59964_ch0  | 1                        | 3.5  | seq-rs8571    | 8                        | 55.8 | c |
| seq-md8273    | 1                        | 3.7  | seq-rs8607    | 8                        | 57.7 |   |
| seq-rs7523    | 1                        | 69.7 | seq-rs8615    | 8                        | 59.3 |   |
| sl_12352_ch0  | 1                        | 80.0 | seq-md103     | 8                        | 60.0 |   |
| sl_17072_ch0  | 1                        | 82.5 | seq-rs11      | 8                        | 62.7 |   |
| seq-rs6425    | 1                        | 84.5 | seq-rs6901    | 9                        | 0.0  |   |
| seq-md6450    | 1                        | 85.5 | seq-rs8128    | 9                        | 1.3  |   |
| seq-rs7796    | 1                        | 89.4 | seq-rs6355    | 9                        | 2.1  |   |
| sl_70010_ch0  | 2                        | 2.2  | sl_16579_ch09 | 9                        | 4.6  |   |
| seq-rs4513    | 2                        | 4.4  | seq-rs6948    | 9                        | 5.8  | c |
| seq-md5719    | 2                        | 28.5 | seq-md2744    | 9                        | 55.6 | c |
| seq-rs4487    | 2                        | 32.3 | seq-rs1913    | 9                        | 60.4 |   |
| seq-rs5606    | 2                        | 34.9 | seq-rs7120    | 9                        | 62.6 |   |
| seq-rs7406    | 2                        | 36.6 | seq-md435     | 9                        | 64.3 |   |
| seq-md6683    | 2                        | 42.5 | seq-rs9071    | 9                        | 65.1 |   |
| seq-rs8849    | 2                        | 47.2 | seq-rs9094    | 9                        | 65.8 |   |
| seq-md8825    | 2                        | 48.1 | seq-rs7089    | 10                       | 1.7  |   |
| seq-wv7270    | 2                        | 49.5 | seq-rs5755    | 10                       | 21.3 | c |
| seq-md8481    | 3                        | 0.9  | seq-rs3687    | 10                       | 61.0 | c |
| sl_101063_ch0 | 3                        | 2.1  | seq-rs3691    | 10                       | 61.7 |   |
| sl_27248_ch0  | 3                        | 50.3 | seq-rs3764    | 10                       | 62.4 |   |
| seq-rs8411    | 3                        | 57.7 | seq-rs5552    | 10                       | 63.7 |   |
| seq-md5556    | 3                        | 61.5 | seq-rs5550    | 10                       | 64.4 |   |
| seq-rs8366    | 3                        | 61.9 | seq-rs470     | 11                       | 4.6  |   |
| seq-rs6996    | 4                        | 0.2  | seq-md8439    | 11                       | 5.3  |   |
| seq-rs4521    | 4                        | 2.3  | seq-md1693    | 11                       | 6.5  | c |
| seq-rs6567    | 4                        | 4.9  | seq-rs2734    | 11                       | 46.4 | c |
| seq-rs6576    | 4                        | 5.5  | seq-rs1504    | 11                       | 48.8 |   |
| seq-rs6701    | 4                        | 51.4 | seq-rs7721    | 11                       | 49.8 |   |
| seq-rs7746    | 4                        | 53.7 | seq-rs7983    | 11                       | 50.5 |   |
| sl_24605_ch0  | 4                        | 55.0 | seq-rs6903    | 11                       | 51.9 |   |
| sl_11562_ch0  | 4                        | 60.1 | seq-rs6924    | 11                       | 52.5 |   |
| seq-md7213    | 4                        | 62.1 | seq-rs4074    | 11                       | 53.2 |   |
| seq-rs9024    | 5                        | 0.3  | seq-rs7045    | 12                       | 0.3  |   |
| sl_52699_ch0  | 5                        | 1.2  | seq-rs6474    | 12                       | 1.8  |   |
| sl_49002_ch0  | 5                        | 3.0  | seq-rs6503    | 12                       | 2.7  |   |
| seq-rs7341    | 5                        | 4.5  | seq-rs6526    | 12                       | 3.8  | c |
| seq-rs33      | 5                        | 5.9  | seq-md851     | 12                       | 32.2 | c |
| seq-md7559    | 5                        | 6.5  | seq-rs3433    | 12                       | 47.5 |   |
| seq-rs4572    | 5                        | 59.6 | seq-rs3993    | 12                       | 48.5 |   |
| seq-rs678     | 5                        | 60.6 | seq-md3504    | 12                       | 62.0 |   |
| seq-rs6199    | 5                        | 62.5 | seq-rs3519    | 12                       | 62.5 |   |
| seq-rs6370    | 6                        | 0.9  |               |                          |      |   |
| seq-md8764    | 6                        | 1.6  |               |                          |      |   |
| seq-rs6881    | 6                        | 32.1 |               |                          |      |   |
| seq-md3553    | 6                        | 34.8 |               |                          |      |   |
| seq-rs3977    | 6                        | 36.8 |               |                          |      |   |
| seq-rs8112    | 6                        | 40.0 |               |                          |      |   |
| seq-rs8086    | 6                        | 41.5 |               |                          |      |   |
| seq-md418     | 6                        | 42.9 |               |                          |      |   |
| seq-rs5410    | 6                        | 44.9 |               |                          |      |   |
| seq-rs8925    | 7                        | 1.8  |               |                          |      |   |
| seq-rs8899    | 7                        | 3.3  |               |                          |      |   |
| seq-rs7703    | 7                        | 57.3 |               |                          |      |   |
| seq-rs7764    | 7                        | 59.0 |               |                          |      |   |
| seq-rs7912    | 7                        | 61.5 |               |                          |      |   |

**Table S2.** Statistical analysis performed through a Chi-square test with application of Bonferroni correction for the wild type (wt) F1/*recq4* F1 comparison.

|                     |           | Average nb. of COs |                 |       | Statistics |    |         |
|---------------------|-----------|--------------------|-----------------|-------|------------|----|---------|
|                     |           | Wt F1              | <i>recq4</i> F1 | Ratio | $\chi^2$   | df | P-value |
| <b>Chromosomes</b>  | <b>01</b> | 1.78               | 2.43            | 1.37  | 12.67      | 8  | <0.05   |
|                     | <b>02</b> | 1.63               | 3.59            | 2.20  | 95.71      | 8  | <0.05   |
|                     | <b>03</b> | 1.10               | 1.53            | 1.39  | 9.62       | 3  | <0.05   |
|                     | <b>04</b> | 1.89               | 2.74            | 1.45  | 20.29      | 7  | <0.05   |
|                     | <b>05</b> | 1.27               | 1.95            | 1.53  | 18.04      | 7  | <0.05   |
|                     | <b>06</b> | 1.52               | 2.95            | 1.94  | 61.46      | 7  | <0.05   |
|                     | <b>07</b> | 1.10               | 1.52            | 1.38  | 10.57      | 3  | <0.05   |
|                     | <b>08</b> | 1.67               | 2.55            | 1.53  | 25.31      | 6  | <0.05   |
|                     | <b>09</b> | 1.82               | 2.65            | 1.46  | 20.71      | 9  | <0.05   |
|                     | <b>10</b> | 1.28               | 1.67            | 1.31  | 6.85       | 5  | >0.05   |
|                     | <b>11</b> | 1.04               | 1.63            | 1.56  | 15.35      | 8  | <0.05   |
|                     | <b>12</b> | 1.51               | 1.69            | 1.12  | 1.06       | 7  | >0.05   |
| <b>Average</b>      |           | 1.47               | 2.24            | 1.53  |            |    |         |
| <b>Whole genome</b> |           | 17.61              | 26.90           | 1.53  | 250.37     | 89 | 2.2E-16 |

**Table S3** Genetic distances in cM for each calculated marker interval compared for wild type F1 and for *recq4* F1, respectively  
 The second separated linkage groups for chromosomes 1 and 3 are indicated by grey shading.

| Chr.                 | Mk1 | Mk2 | MAP with Kosambi (in cM) |                    |
|----------------------|-----|-----|--------------------------|--------------------|
|                      |     |     | wild type F1             | <i>recq4</i> F1    |
| <b>Chr.01</b>        |     |     | <b>73,3 + 25,3</b>       | <b>99,6 + 52,6</b> |
| Chr.01               | 1   | 2   | 12                       | 13                 |
| Chr.01               | 2   | 3   | 16                       | 11                 |
| Chr.01               | 3   | 4   | 6                        | 6                  |
| Chr.01               | 4   | 5   | 4                        | 1                  |
| Chr.01               | 5   | 6   | 13                       | 30                 |
| Chr.01               | 6   | 7   | 13                       | 19                 |
| Chr.01               | 7   | 8   | 10                       | 20                 |
| Chr.01               | 9   | 10  | 5                        | 9                  |
| Chr.01               | 10  | 11  | 21                       | 43                 |
| <b>Chr.02</b>        |     |     | <b>89.1</b>              | <b>287.9</b>       |
| Chr.02               | 12  | 13  | 3                        | 1                  |
| Chr.02               | 13  | 14  | 5                        | 17                 |
| Chr.02               | 14  | 15  | 9                        | 28                 |
| Chr.02               | 15  | 16  | 16                       | 31                 |
| Chr.02               | 16  | 17  | 9                        | 20                 |
| Chr.02               | 17  | 18  | 20                       | 69                 |
| Chr.02               | 18  | 19  | 16                       | 93                 |
| Chr.02               | 19  | 20  | 3                        | 16                 |
| Chr.02               | 20  | 21  | 8                        | 14                 |
| <b>Chr.03</b>        |     |     | <b>49,9 + 18,8</b>       | <b>44,6 + 71,2</b> |
| Chr.03               | 22  | 23  | 19.1                     | 13.1               |
| Chr.03               | 23  | 24  | 30.8                     | 31.5               |
| Chr.03               | 25  | 26  | 15.3                     | 64.2               |
| Chr.03               | 26  | 27  | 3.5                      | 7.0                |
| <b>Chr.04</b>        |     |     | <b>116.6</b>             | <b>170.2</b>       |
| Chr.04               | 28  | 29  | 13                       | 22                 |
| Chr.04               | 29  | 30  | 33                       | 18                 |
| Chr.04               | 30  | 31  | 2                        | 9                  |
| Chr.04               | 31  | 32  | 7                        | 26                 |
| Chr.04               | 32  | 33  | 6                        | 20                 |
| Chr.04               | 33  | 34  | 6                        | 3                  |
| Chr.04               | 34  | 35  | 17                       | 28                 |
| Chr.04               | 35  | 36  | 34                       | 44                 |
| <b>Chr.05</b>        |     |     | <b>68.9</b>              | <b>111.4</b>       |
| Chr.05               | 37  | 38  | 7                        | 10                 |
| Chr.05               | 38  | 39  | 13                       | 18                 |
| Chr.05               | 39  | 40  | 16                       | 16                 |
| Chr.05               | 40  | 41  | 7                        | 11                 |
| Chr.05               | 41  | 42  | 3                        | 5                  |
| Chr.05               | 42  | 43  | 5                        | 20                 |
| Chr.05               | 43  | 44  | 4                        | 7                  |
| Chr.05               | 44  | 45  | 15                       | 26                 |
| <b>Chr.06</b>        |     |     | <b>82.5</b>              | <b>217.3</b>       |
| Chr.06               | 46  | 47  | 5                        | 9                  |
| Chr.06               | 47  | 48  | 18                       | 32                 |
| Chr.06               | 48  | 49  | 10                       | 22                 |
| Chr.06               | 49  | 50  | 8                        | 22                 |
| Chr.06               | 50  | 51  | 13                       | 81                 |
| Chr.06               | 51  | 52  | 11                       | 19                 |
| Chr.06               | 52  | 53  | 7                        | 13                 |
| Chr.06               | 53  | 54  | 10                       | 20                 |
| <b>Chr.07</b>        |     |     | <b>63.6</b>              | <b>98.5</b>        |
| Chr.07               | 55  | 56  | 19                       | 13                 |
| Chr.07               | 56  | 57  | 21                       | 38                 |
| Chr.07               | 57  | 58  | 7                        | 17                 |
| Chr.07               | 58  | 59  | 17                       | 31                 |
| <b>Chr.08</b>        |     |     | <b>95.0</b>              | <b>177.1</b>       |
| Chr.08               | 60  | 61  | 7                        | 7                  |
| Chr.08               | 61  | 62  | 25                       | 18                 |
| Chr.08               | 62  | 63  | 21                       | 65                 |
| Chr.08               | 63  | 64  | 11                       | 23                 |
| Chr.08               | 64  | 65  | 10                       | 23                 |
| Chr.08               | 65  | 66  | 6                        | 10                 |
| Chr.08               | 66  | 67  | 15                       | 32                 |
| <b>Chr.09</b>        |     |     | <b>101.8</b>             | <b>153.6</b>       |
| Chr.09               | 68  | 69  | 9                        | 11                 |
| Chr.09               | 69  | 70  | 12                       | 8                  |
| Chr.09               | 70  | 71  | 27                       | 19                 |
| Chr.09               | 71  | 72  | 6                        | 16                 |
| Chr.09               | 72  | 73  | 5                        | 14                 |
| Chr.09               | 73  | 74  | 7                        | 31                 |
| Chr.09               | 74  | 75  | 6                        | 15                 |
| Chr.09               | 75  | 76  | 14                       | 20                 |
| Chr.09               | 76  | 77  | 9                        | 10                 |
| Chr.09               | 77  | 78  | 8                        | 9                  |
| <b>Chr.10</b>        |     |     | <b>75.3</b>              | <b>99.6</b>        |
| Chr.10               | 79  | 80  | 29                       | 29                 |
| Chr.10               | 80  | 81  | 24                       | 29                 |
| Chr.10               | 81  | 82  | 5                        | 10                 |
| Chr.10               | 82  | 83  | 5                        | 10                 |
| Chr.10               | 83  | 84  | 6                        | 13                 |
| Chr.10               | 84  | 85  | 7                        | 9                  |
| <b>Chr.11</b>        |     |     | <b>55.0</b>              | <b>87.6</b>        |
| Chr.11               | 86  | 87  | 3                        | 9                  |
| Chr.11               | 87  | 88  | 3                        | 12                 |
| Chr.11               | 88  | 89  | 4                        | 14                 |
| Chr.11               | 89  | 90  | 8                        | 11                 |
| Chr.11               | 90  | 91  | 4                        | 7                  |
| Chr.11               | 91  | 92  | 7                        | 7                  |
| Chr.11               | 92  | 93  | 16                       | 14                 |
| Chr.11               | 93  | 94  | 7                        | 6                  |
| Chr.11               | 94  | 95  | 4                        | 9                  |
| <b>Chr.12</b>        |     |     | <b>81.8</b>              | <b>94.8</b>        |
| Chr.12               | 96  | 97  | 12                       | 21                 |
| Chr.12               | 97  | 98  | 13                       | 6                  |
| Chr.12               | 98  | 99  | 10                       | 9                  |
| Chr.12               | 99  | 100 | 15                       | 21                 |
| Chr.12               | 100 | 101 | 10                       | 16                 |
| Chr.12               | 101 | 102 | 11                       | 13                 |
| Chr.12               | 102 | 103 | 5                        | 4                  |
| Chr.12               | 103 | 104 | 7                        | 6                  |
| <b>Entire genome</b> |     |     | <b>997</b>               | <b>1766</b>        |

**Table S4.** Guide RNA sequences, cloning vectors, and PCR and sequencing primers. Vectors and plasmids were gifts from Jonathan D. Jones, Sophien Kamoun, and Sylvestre Marillonnet. Addgene number for reference and acknowledgement of the submitter refers to [www.addgene.org](http://www.addgene.org).

| <b>Guide</b>    | <b>Sequence (+PAM)</b>    |
|-----------------|---------------------------|
| <i>RECQ4</i> t1 | ATAAGCTTCCAAAAGCCAAC(TGG) |
| <i>RECQ4</i> t2 | AATAGCATGTTGCGTCCAGT(TGG) |
| <i>RECQ4</i> t3 | CCAAGAGTTACACAAGACCA(GGG) |
| <i>RECQ4</i> t4 | GTAGACAATTCACATGCTCG(AGG) |

  

| <b>Vector/plasmid</b>        | <b>Addgene number</b> | <b>Purpose</b>                    |
|------------------------------|-----------------------|-----------------------------------|
| pICH47732:: pNOS-NPTII-tOCS) | 51144                 | Level 1, pos. 1, <i>NPTII</i>     |
| pICH47742::2xp35S-hCas9-tNOS | 49771                 | Level 1, pos. 2, <i>Cas9</i>      |
| pICH47751                    | 48002                 | Level 1, pos. 3, sgRNA for t1     |
| pICH47761                    | 48003                 | Level 1, pos. 4, sgRNA for t2     |
| pICH47772                    | 48004                 | Level 1, pos. 5, sgRNA for t4     |
| pICH47781                    | 48005                 | Level 1, pos. 6, sgRNA for t3     |
| pICH41800                    | 48020                 | End linker for cloning in level 2 |
| pAGM4723                     | 48015                 | Level 2 binary plant vector       |

  

| <b>Primer</b> | <b>Sequence</b>           | <b>Purpose</b>                  |
|---------------|---------------------------|---------------------------------|
| AL722         | TTTCATGCTCATTTCTGGAC      | Forward primer for <i>RECQ4</i> |
| AL723         | GGACAACCTCTGGTGGCAAAT     | Reverse primer for <i>RECQ4</i> |
| AL739         | CCTAGTTTCAAAAAGTCAACAACCA | Reverse sequencing primer       |
| AL745         | CCAACCATTTCCTTCTTGAC      | Forward sequencing primer       |
